# Supplementary material for: Understanding coastal wetland conditions and futures by closing their hydrologic balance: the case of Gialova lagoon, Greece
Source: Copernicus journal article supplement (doi:10.5194/hess-2019-382), 2019-08-19
Supplement: Supplementary file [file hess-2019-382-AC2-supplement.pdf]

## Response to Anonymous Referee #2

We thank Referee #2 for his/her comments, which are addressed as explained below. The Referee's text is reported in *Italic* and our responses in *roman*.

*The manuscript presents a coupled water-salt mass balance model for estimating water fluxes of coastal water bodies. The approach was tested for the Gialova lagoon in Greece. Different water sources and fluxes were calculated for today's climate and three different climate change scenarios. The results indicate different and variable contributions of fresh water and salt water fluxes going into and out of the lagoon throughout the year. Future scenarios show that salinity will increase in the lagoon. Therefore, management options have to be developed to maintain freshwater input into the system. The manuscript is very well written and the results are interesting, also for other coastal wetlands in similar climatic areas. I have some recommendations that are outlined below.*

Thanks for these encouraging comments and for the suggestions, which were implemented as explained below.

*1) What is the salinity of surrounding aquifers? Is the saline water flux solely coming from the Mediterranean Sea or can it also be from groundwater?*

A network of wells around the Gialova Lagoon is now being monitored (starting after the date of submission of this manuscript) (Pantazis, 2019). Preliminary data show that the aquifers surrounding the Gialova Lagoon are mostly delivering a steady supply of freshwater, but relatively high chloride concentrations have been measured in three wells north of the main body of the lagoon (150-200 mg/l). These wells are in an area of low hydraulic head gradient and thus are prone to inputs of saline water from the lagoon. Most other wells are located on the east side of the lagoon and are representative of conditions in the aquifer that provides freshwater to the Tyflomitis artesian springs.

To include further information (which was not available at the time of submission), we can amend Section 2.1 as follows:

“The aquifers North of the lagoon are prone to salt intrusion from the Gialova lagoon, at least during the dry season (Pantazis, 2019). On the East and South-East sides, wetland areas surround the main lagoon water body. The Tyflomitis artesian springs provide freshwater inputs in this area, thanks to freshwater aquifers feeding them from the East (Pantazis, 2019).”

An additional clarification will also be included in Section 4.2 of the Discussion:

“In that area East of the lagoon, hydraulic gradients are steeper, allowing freshwater aquifers to deliver water to the Tyflomitis springs (Pantazis, 2019).”

*2) Evaporation is considered; however, what is the impact of evaporation on the increase of salinity? How is it considered here?*

Evaporation from the lagoon is an important term in the water balance. By removing water while leaving solutes in the lagoon, any increase in evaporation that is not compensated for by increased precipitation or freshwater inputs will increase salinity. This effect is perhaps best explained by looking at Figure 6, which we plan to modify following the suggestion of

Reviewer #1 (see Response to Anonymous Referee #1). Figure 6a shows that increasing evaporation rate causes salinity to also increase (from dotted to dashed and solid lines). If, in addition to higher evaporation, precipitation and/or freshwater inputs decrease, salinity increases even further. Similar trends are also apparent when looking at the percentage of time the lagoon is expected to be under hypersaline conditions (Figure 6b, originally labelled Figure 7a). The text describing Figure 6a will be amended as follows to highlight the importance of evaporation:

“An increase of 10% in evaporation rate alone (as would be caused by higher temperatures) is predicted to increase salinity by approximately 5%. Any decrease in precipitation in combination with increasing evaporation rate further increases salinity due to accumulation of salt from the marine sources.”

Additional explanations of evaporation effects on salinity are provided where climate change scenarios are described. In fact, scenarios C2 and C3 include variations in evaporation rate without or in addition to decreased precipitation, respectively.

*3) The average depth is given (0.6 m). What is the range of depths though?*

The water depth in the Gialova lagoon – based on more than thirty uniformly spaced measurements by Dounas and Koutsoubas (1996) – ranges between 270 and 770 mm (excluding the shoreline and the area immediately adjacent to the channel connecting the lagoon to the sea). In the same study, the overall standard deviation of the water depth is approximately 130 mm. To provide more details on water depth as suggested by the reviewer, we will include the following information at the beginning of Section 2.1:

“The spatial average of water depth in the main water body is approximately 0.6 m, with a range between 0.27 and 0.77 m (Dounas and Koutsoubas, 1996).”

*At which depths were samples taken? How is the salt distribution with depths? This can be relevant if salinity increases with depth or if there are local depression within the lagoon with higher salt content that are not completely mixed with the rest of water in the lagoon. Some of it is discussed, but more information could be provided.*

The continuous measurements presented in this manuscript were taken from probes anchored to solid structures, so they experienced fluctuating water levels. Measurements during the field campaigns were taken at the water surface. The area is generally windy (typically above 2 m/s, see Figure 3 in the manuscript) and the recirculation due to tidal fluctuations is large. For these reasons we regarded the lagoon as vertically well-mixed at the daily time scale. Here we add further evidence in support to this assumption.

We monitored electrical conductivity and temperature at two depths (25 cm depth difference) in the central point of the lagoon. It would be of course ideal to have more vertical profiles, and we will keep this in mind for future work. Unfortunately, equipment malfunctions caused data gaps that do not allow a complete comparison of the conductivity data between the two sensors. However, when both sensors were working, electrical conductivity values were similar. The temperature record from these two sensors is instead nearly complete, and the temperature values at the two depths were highly correlated (Pearson correlation coefficient=0.998; Figure R1). This indicates minimal thermal stratification at the daily time scale and thus well-mixed conditions along the vertical profile.

The result of this analysis will be added in Section 4.1 of the Discussion, where the limitations of our approach are presented:

“Moreover, vertical mixing is ensured by wave motion and tidal fluctuations in this shallow water body. Thermal stratification is minimal at the temporal scale of this study, as indicated by highly correlated water temperatures at the two sampled depths in the central measurement point (Pearson correlation coefficient  $r=0.998$ ).”

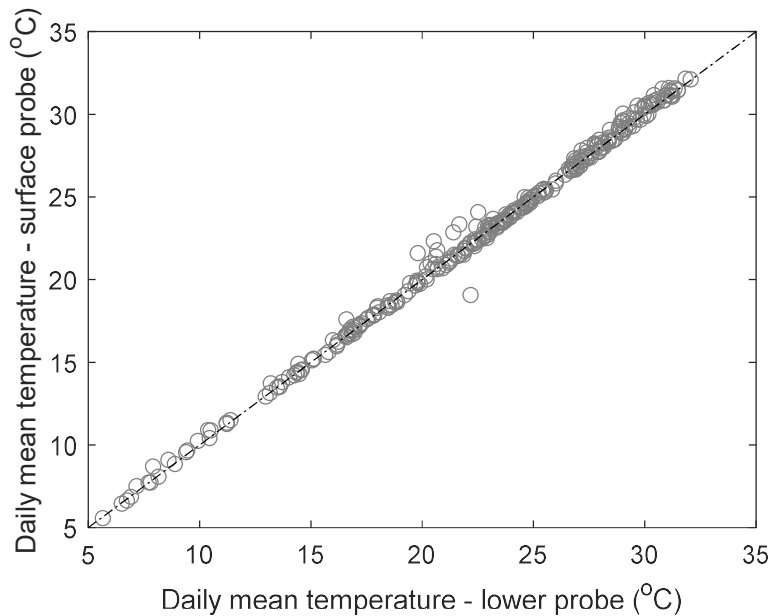

**Figure R1. Strong correlation (Pearson correlation coefficient=0.998) between daily mean temperatures measured by two probes at different depths in the central point of the Gialova lagoon. The lower probe was placed 25 cm deeper than the surface probe; both were anchored to a cement pillar and thus experienced fluctuating water levels. The dot-dashed line represents the 1:1 line.**

4) *The water level in the lagoon was kept to current conditions also in the scenarios. How would a decline in groundwater levels due to increased evapo(transpi)ration affect the water levels and the water balance? This could be included in the discussion.*

This is an interesting point we had not considered in the initial submission. Given the strong hydrological coupling between Gialova lagoon and Navarino bay (Supplementary Section S1), we would argue that sea water level will control the water level in the lagoon, regardless of changes in groundwater level. However, lower groundwater could reduce freshwater inputs, altering salinity even if the lagoon water level does not change. In Section 4.2, we will expand the discussion on consequences of catchment-scale hydrologic changes by adding the following sentence along the lines suggested by the reviewer:

“Concurrently, groundwater levels are also expected to decrease, potentially causing saline intrusions around the lagoon – a process already ongoing at least at the end of the dry season (Pantazis, 2019).”

In Section 4.3, we will also remind the reader that groundwater will be impacted by higher water demand in the catchment:

“These estimates do not reflect the expected reduction in precipitation and increase evaporation in the coming decades, which will decrease both runoff to and groundwater flow in the lagoon.”

*Other, specific comments:*

- Figure 1a: the map is really small and difficult to identify the lagoon; Figure 1b: in the figure title, it says mean annual precipitation, but actually monthly values are given; error bars would be good to add

We agree that Figure 1a can be improved along these lines: the area around the Gialova lagoon will be enlarged and font size will be increased. In Figure 1b-c, we can include a shaded band around the mean to indicate the variability. Since these hydrological variables are not normally distributed, it is more instructive to show the variability between the 5<sup>th</sup> and 95<sup>th</sup> percentiles rather than the standard deviation. The revised Figure 1b-c will be described with these additional sentences in Section 2.1:

“Seasonal patterns are clear in all these hydro-climatic variables, with dry and hot summers and wet and mild winters. Precipitation shows higher variability than temperature and potential evapotranspiration, as indicated by larger differences between 5<sup>th</sup> and 95<sup>th</sup> percentiles (shaded areas in Fig. 1b-c).”

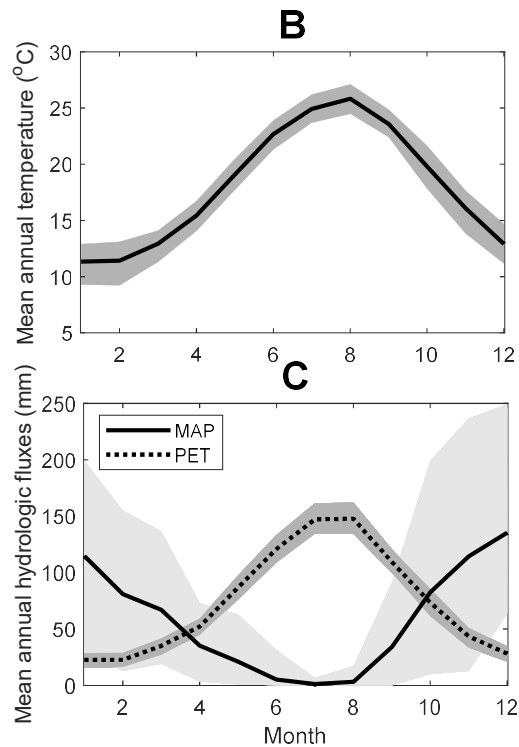

**Fig. 1b-c.** b) long-term mean annual temperature; c) long-term mean annual precipitation (MAP) and potential evapotranspiration (PET). In panels (b) and (c), shaded areas indicate the variability around the mean (5<sup>th</sup> and 95<sup>th</sup> percentiles).

- *Figure S2: error bars (standard deviation) for the spatial average salinity are missing; this applies to other figures showing mean values too; this will help to get some idea about the uncertainty of the calculations*

In Figures S2 and S4, values are areal averages, that is, weighed averages based on the specific sampling design of each field campaign. While the design was generally comparable (sampling points along the shoreline and some in the central part of the lagoon), the number of sampling points differed throughout the years, so standard deviations and standard errors will also vary because of these differences, making them difficult to interpret. For this reason, we would prefer keeping Figures S2 and S4 as they are in the initial submission.

To give an idea of the degree of spatial variability and its consistency through time, we calculated the standard deviations of salinity from the study by Dounas and Koutsoubas (1996). Data refer to the 1995-1996 field campaign and are shown in aggregated form in Figures S2 and S4. Four measurements uniformly spread in the lagoon at each of 22 sampling dates were considered to calculate the standard deviation, resulting in an average standard deviation of 4.6 g/l (range: 0.8 to 12.2 g/l; 1<sup>st</sup> and 3<sup>rd</sup> quartiles: 1.9 and 6.9 g/l, respectively). The seasonal variations in salinity are in the order of 30 g/l (Figure 2), suggesting that spatial variability is relatively low compared to temporal variability, consistent with the model assumptions.

- *line 326: indicate what hypersaline means in brackets.*

For clarity, we will amend the sentence where the term “hypersaline” first appears as follows:

“Salinity tends to increase during the spring and throughout the summer, peaking in late summer or early fall (hypersaline conditions, defined here with respect to the average seawater salinity of 38.5 g L<sup>-1</sup>).”

## **References**

Dounas K. and D. Koutsoubas (1996). Environmental Impact Study on pollution from petroleum products in Navarino Bay and Gialova Lagoon wetland, Institute of Marine Biology of Crete, 298 pages (available in Greek).

Pantazis C. (2019). Ecosystem services and groundwater quality: the case study of Gialova Lagoon, MSc thesis, National Technical University of Athens, Metsovion Interdisciplinary Research Center, 71 pages.
